# Supplementary material for: Synthesis and characterization of18F-labeled hydrazinocurcumin derivatives for tumor imaging
Source: Royal Society of Chemistry journal article supplement (doi:10.1039/c5ra15380h), 2015-01-01
Supplement: c5ra15380h1.pdf [file c5ra15380h1.pdf]

## Supplementary Information

### Synthesis and characterization of $^{18}\text{F}$ -labeled hydrazinocurcumin derivatives for tumor imaging

Sarah Shin,<sup>ab</sup> Hyun-Jung Koo,<sup>a</sup> Iljung Lee,<sup>a</sup> Yearn Seong Choe,<sup>\*ab</sup> Joon Young Choi,<sup>a</sup>  
Kyung-Han Lee<sup>ab</sup> and Byung-Tae Kim<sup>a</sup>

<sup>a</sup>Department of Nuclear Medicine, Samsung Medical Center, Sungkyunkwan University  
School of Medicine, 81 Ilwon-ro, Kangnam-ku, Seoul 135-710, Korea

<sup>b</sup>Department of Health Sciences and Technology, SAIHST, Sungkyunkwan University, Seoul  
135-710, Korea

#### Contents:

1.  $^1\text{H}$  NMR spectra of compounds **1-6** and precursors (**26** and **27**) ..... S2 - S5
2. HPLC chromatograms of compounds **1-6** and precursors (**26** and **27**) ..... S6 - S9
3. HPLC chromatograms of the radioligands ..... S10
4. 2D ROESY spectra of **2** ..... S11

# 1. <sup>1</sup>H NMR spectra of compounds 1-6 and precursors

## Compound 1

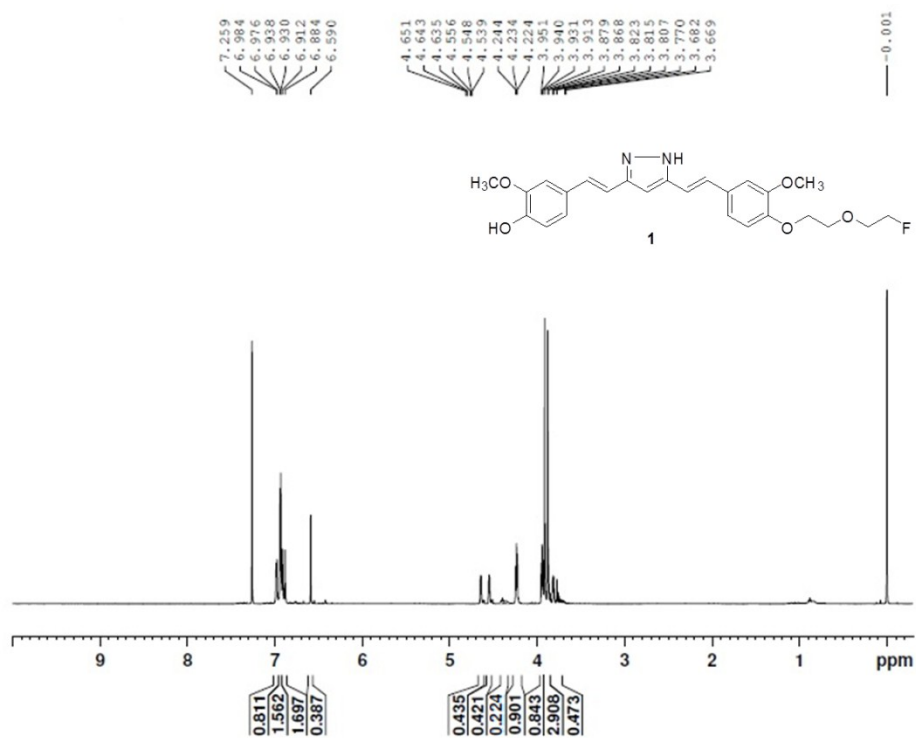

## Compound 2

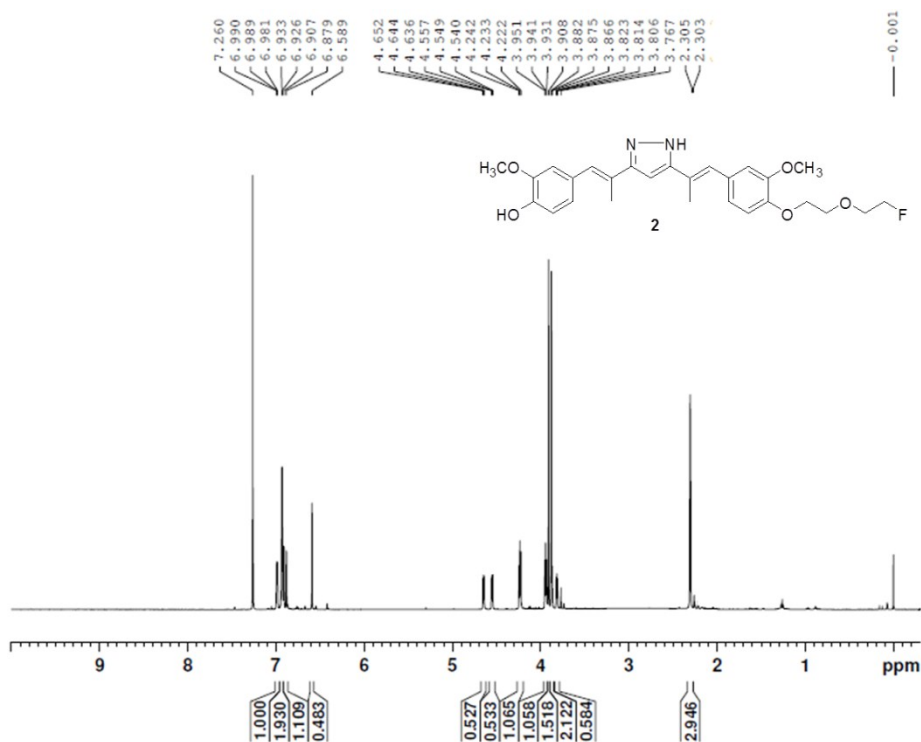

# Compound 3

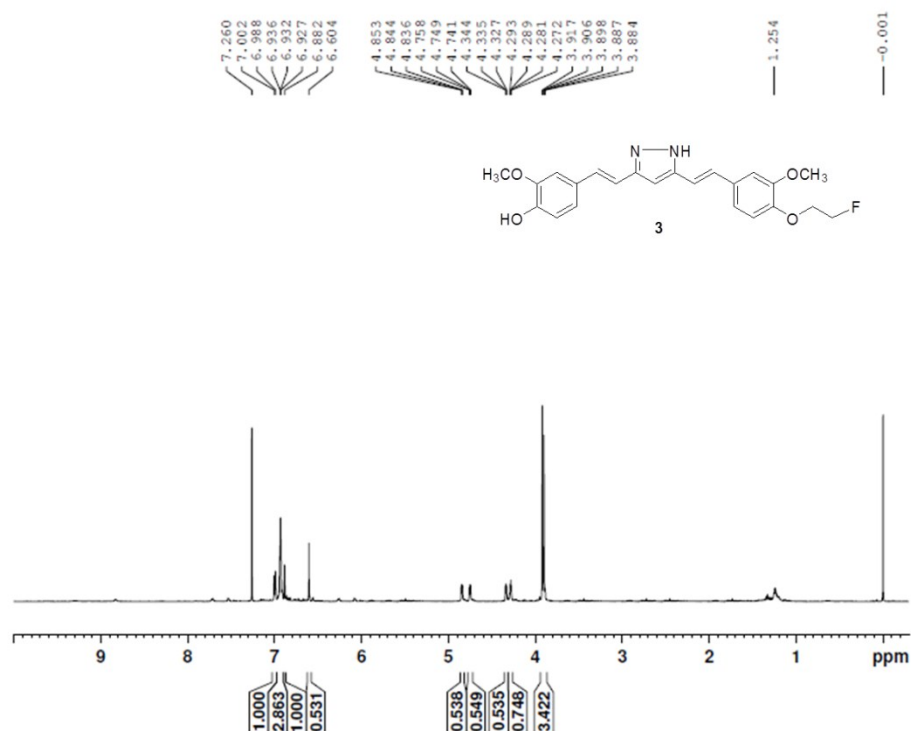

# Compound 4

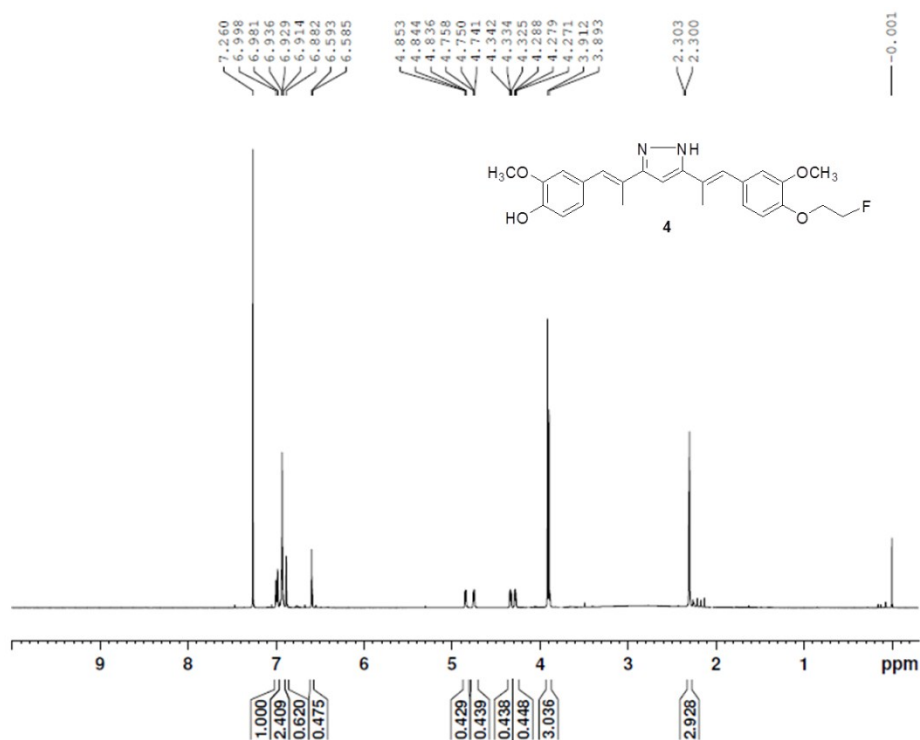

## Compound 5

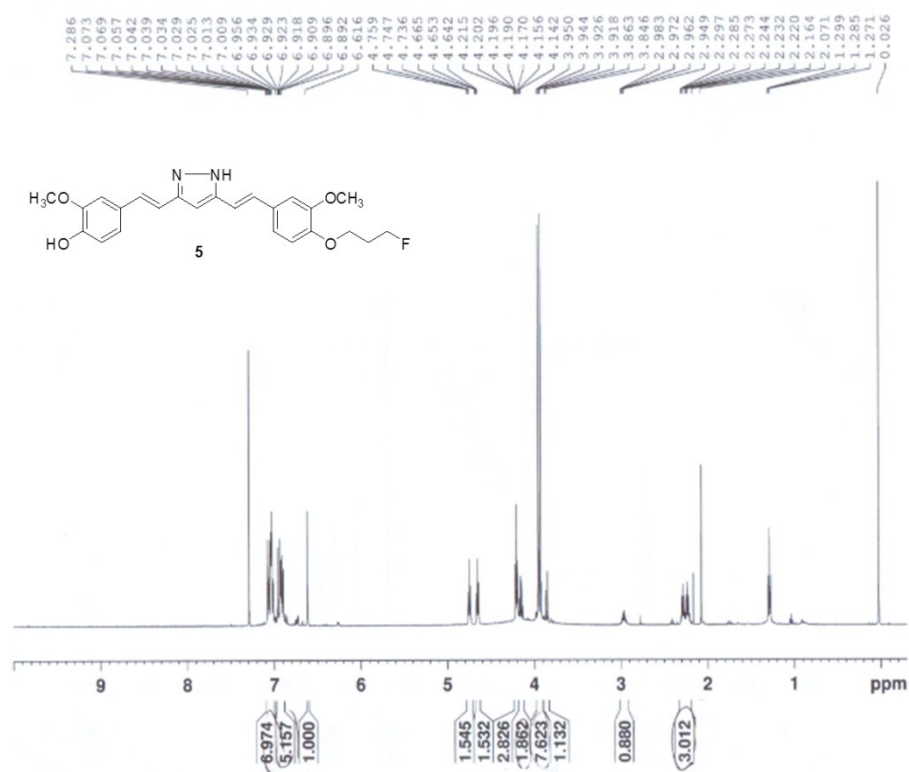

## Compound 6

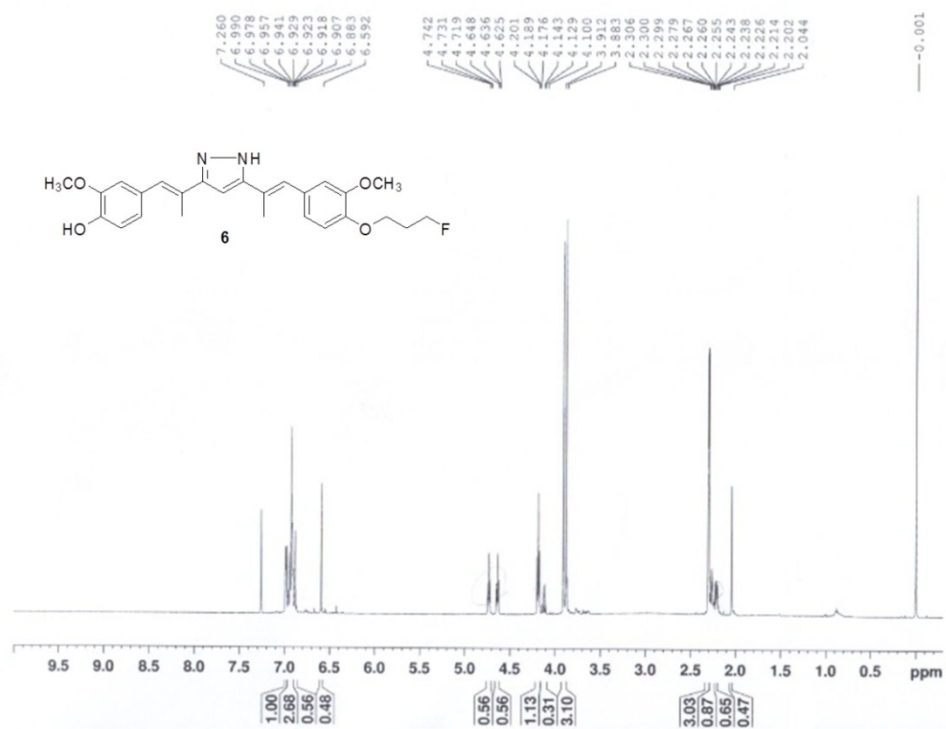

## Precursor 26

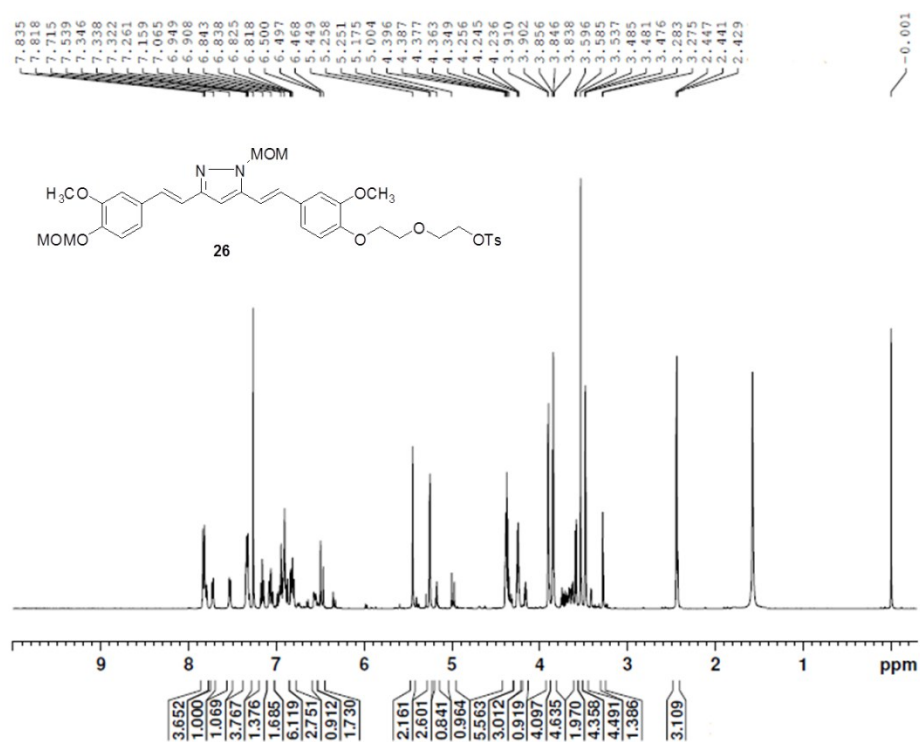

## Precursor 27

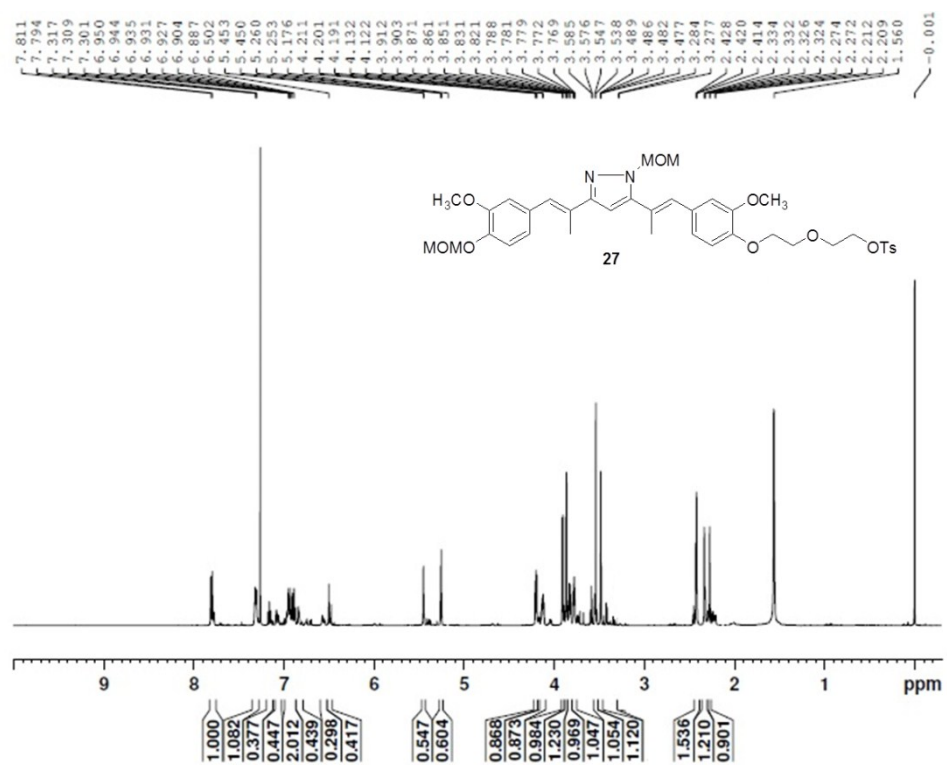

## 2. HPLC chromatograms of target compounds and precursors

HPLC column: YMC-Pack C18 (4.6 x 250 mm, 5  $\mu$ m)

Flow rate: 1 mL/min

Detection: UV detector (254 nm)

### Compound 1

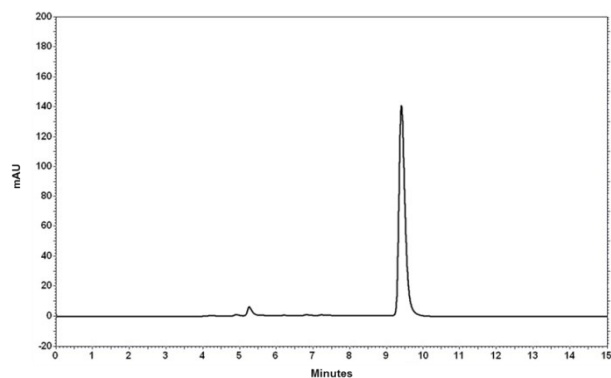

HPLC solvents: 30:70 H<sub>2</sub>O (0.1% trifluoroacetic acid)-CH<sub>3</sub>CN

Retention time: 9.40 min

Chemical purity: 98.99%

### Compound 2

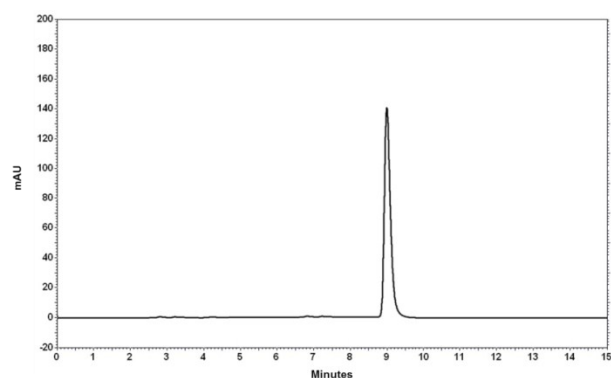

HPLC solvents: 25:75 H<sub>2</sub>O (0.1% trifluoroacetic acid)-CH<sub>3</sub>CN

Retention time: 9.08 min

Chemical purity: 99.64%

### Compound 3

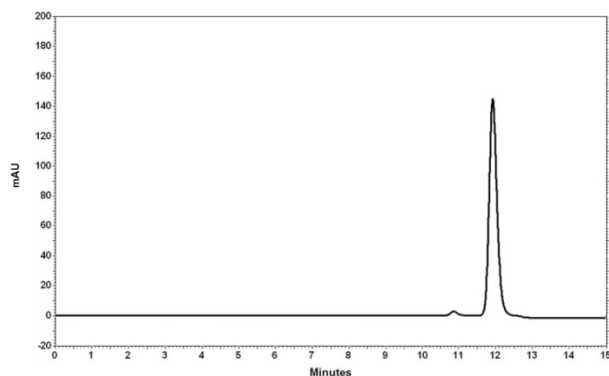

HPLC solvents: 55:45 H<sub>2</sub>O (0.1% trifluoroacetic acid)-CH<sub>3</sub>CN

Retention time: 12.08 min

Chemical purity: 99.01%

### Compound 4

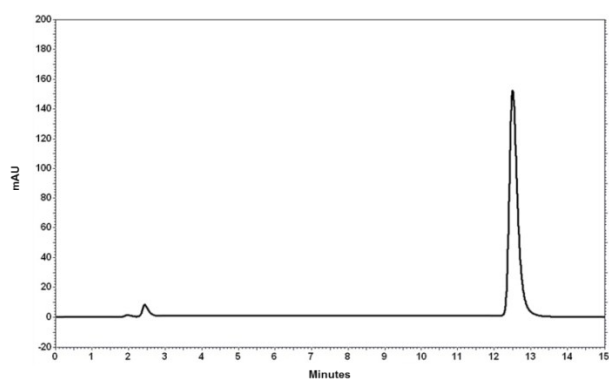

HPLC solvents: 55:45 H<sub>2</sub>O (0.1% trifluoroacetic acid)-CH<sub>3</sub>CN

Retention time: 12.54 min

Chemical purity: 98.94%

## Compound 5

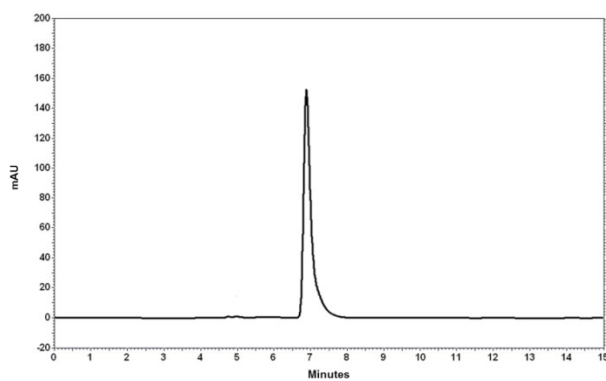

HPLC solvents: 45:55 H<sub>2</sub>O (0.1% trifluoroacetic acid)-CH<sub>3</sub>CN

Retention time: 6.97 min

Chemical purity: 99.84%

## Compound 6

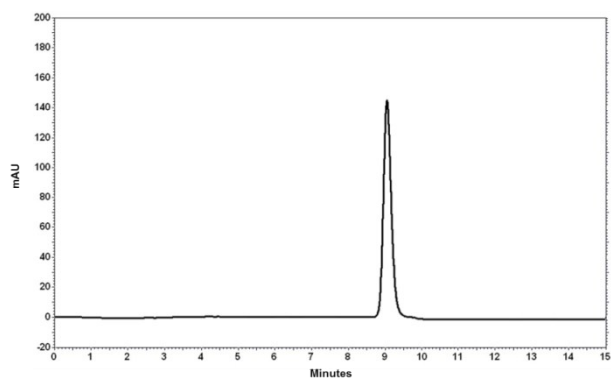

HPLC solvents: 45:55 H<sub>2</sub>O (0.1% trifluoroacetic acid)-CH<sub>3</sub>CN

Retention time: 9.09 min

Chemical purity: 99.96%



## Precursor 26

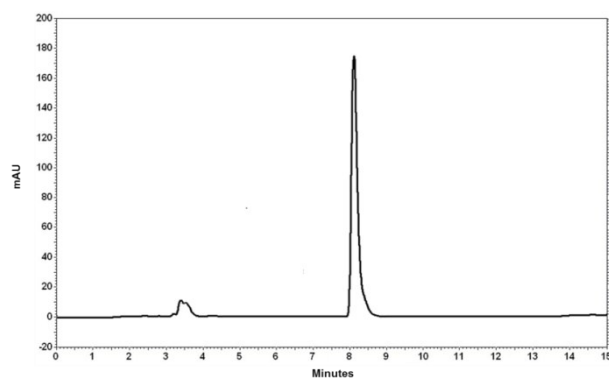

HPLC solvents: 20:80 H<sub>2</sub>O (0.1% trifluoroacetic acid)-CH<sub>3</sub>CN

Retention time: 8.24 min

Chemical purity: 96.54%

## Precursor 27

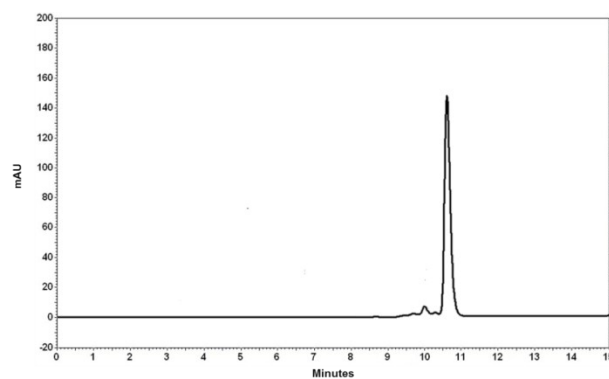

HPLC solvents: 20:80 H<sub>2</sub>O (0.1% trifluoroacetic acid)-CH<sub>3</sub>CN

Retention time: 10.78 min

Chemical purity: 99.03%

**3. HPLC chromatograms of final radioligands ( $[^{18}\text{F}]1$  and  $[^{18}\text{F}]2$ ) and after co-injection of the radioligands with the corresponding cold ligands**

HPLC column: YMC-Pack C18 (4.6 x 250 mm, 5  $\mu\text{m}$ )

Flow rate: 1 mL/min

Detection: NaI(Tl) radioactivity detector (black) and UV detector (grey)

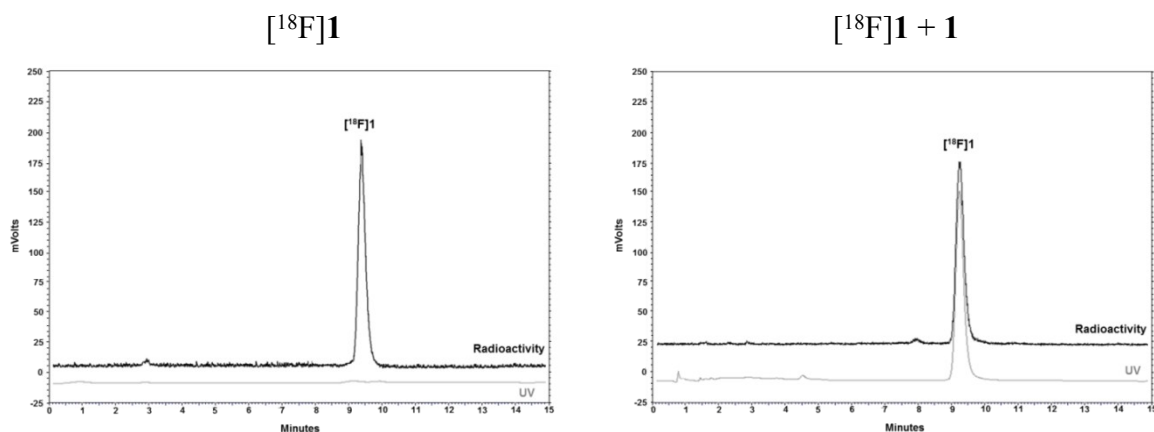

Retention time: 9.42 min

Radiochemical purity: 98.20%

HPLC solvents: 30:70  $\text{H}_2\text{O}$  (0.1% trifluoroacetic acid)- $\text{CH}_3\text{CN}$

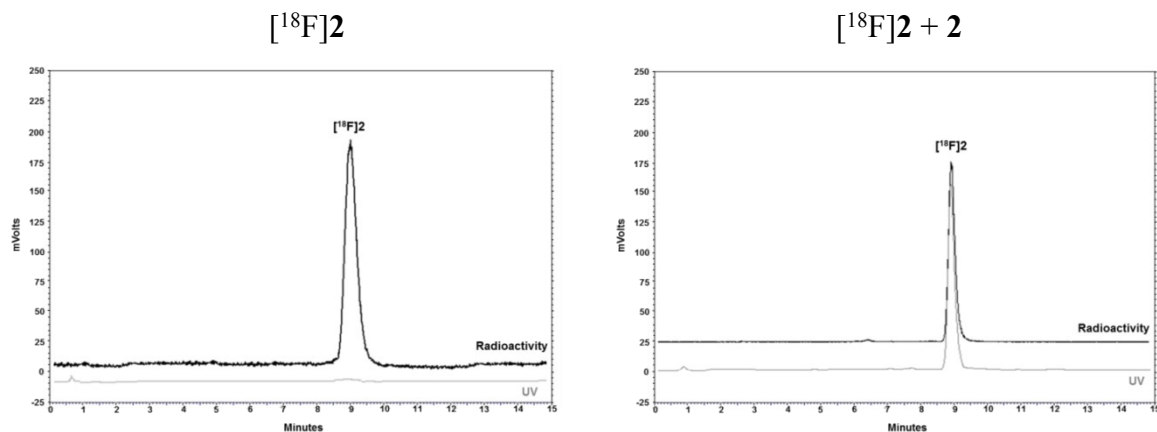

Retention time: 9.02 min

Radiochemical purity: 99.56%

HPLC solvents: 25:75  $\text{H}_2\text{O}$  (0.1% trifluoroacetic acid)- $\text{CH}_3\text{CN}$

#### 4. 2D ROESY spectra of **2**

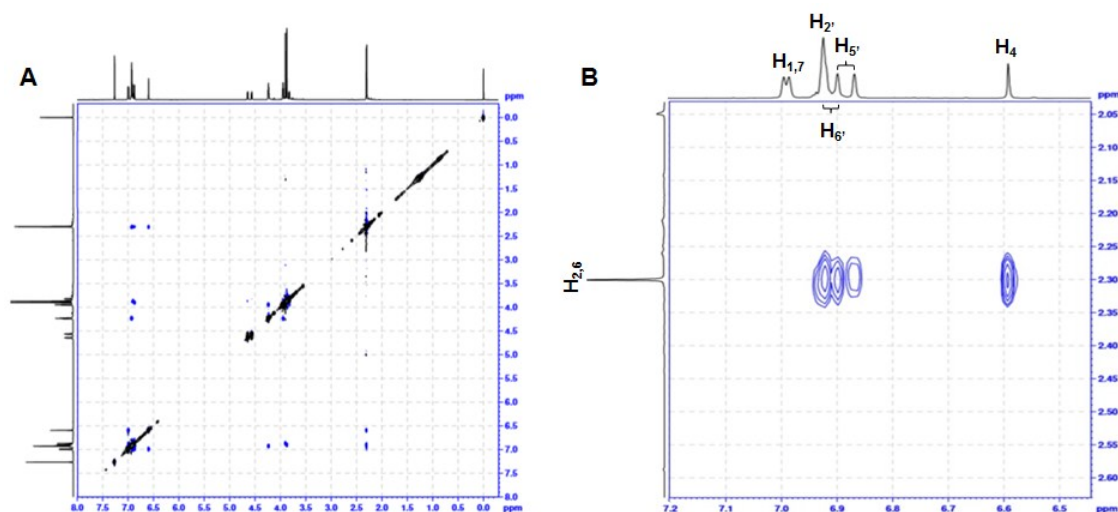

(A) Full spectrum; (B) partially enlarged spectrum of (A); Methyl groups at C2 and C6 positions of **2** are confirmed to have *E,E*-configurations, as no cross-peaks were detected between methyl protons at C2 and C6 positions, indicated as H<sub>2,6</sub> (2.30 ppm), and olefinic protons at C1 and C7 positions, indicated as H<sub>1,7</sub> (6.98 and 6.99 ppm). The numbers with a prime symbol indicate the positions of aromatic carbons.
